# Supplementary material for: Modified Lactoperoxidase System as a Promising Anticaries Agent: In Vitro Studies on Streptococcus mutans Biofilms
Source: MDPI journal article supplement (doi:10.3390/ijms241512136), 2023-07-28
Supplement: s1 [file s1]

**Table S1.** Influence of all tested LPO system modifications on *S. mutans* total biofilm biomass and total insoluble polysaccharide mass. Values are expressed as fraction of control sample (which is equal to 1) to eliminate variations observed among different plates. Control sample consisted of biofilm treated only with PBS. Asterisks indicate a statistically significant difference between a tested group and the control in the post hoc Tukey's test—\*  $p < 0.05$ ; \*\*  $p < 0.01$ ; \*\*\*  $p < 0.001$ .

| Group                                   |                         | Total biomass              | Insoluble                                      |
|-----------------------------------------|-------------------------|----------------------------|------------------------------------------------|
| System                                  | H2O2 concentration [μM] | [relative to control] ± SD | polysaccharide mass [relative to control] ± SD |
| LPO + SCN <sup>-</sup>                  | 250                     | 0.7618** ± 0.0929          | 1.0594 ± 0.0527                                |
|                                         | 500                     | 0.7959** ± 0.0899          | 1.0562 ± 0.1100                                |
|                                         | 1000                    | 0.8186 ± 0.0996            | 1.1308 ± 0.0802                                |
| LPO + SCN <sup>-</sup> + I <sup>-</sup> | 250                     | 0.8618 ± 0.0839            | 0.9321 ± 0.0824                                |
|                                         | 500                     | 0.7343*** ± 0.0408         | 0.9179 ± 0.0873                                |
|                                         | 1000                    | 0.8722 ± 0.1139            | 0.7810 ± 0.1659                                |
| LPO + SeCN <sup>-</sup>                 | 250                     | 0.6935*** ± 0.0167         | 0.5275*** ± 0.1117                             |
|                                         | 500                     | 0.6206*** ± 0.0443         | 0.2907*** ± 0.0810                             |
|                                         | 1000                    | 0.3054*** ± 0.0431         | 0.1833*** ± 0.0446                             |
| LPO + I <sup>-</sup>                    | 250                     | 0.1557*** ± 0.0206         | 0.1879*** ± 0.0400                             |
|                                         | 500                     | 0.1499*** ± 0.0836         | 0.1440*** ± 0.0173                             |
|                                         | 1000                    | 0.1392*** ± 0.0271         | 0.1441*** ± 0.0192                             |
| H2O2 toxicity control                   | 250                     | 0.7639* ± 0.1276           | 1.006 ± 0.0411                                 |
|                                         | 500                     | 0.7872* ± 0.0736           | 0.9513 ± 0.0684                                |
|                                         | 1000                    | 0.7792 ± 0.2045            | 0.9856 ± 0.0921                                |
| Control                                 | -                       | 1.0000 ± 0.1197            | 1.0000 ± 0.0504                                |

**Table S2.** Area under kinetic curves (relative to control) of lactate production and glucose/sucrose consumption (biofilm 2 h). In the case of lactate, lower indicates on a slowed down production of lactate in tested system. In the case of glucose/sucrose, higher values indicates reduced consumption of glucose/sucrose by biofilm. Asterisks indicate a statistically significant difference between a tested group and the control in the post hoc Tukey's test—\*\*  $p < 0.01$ ; \*\*\*  $p < 0.001$ .

| System                                  | H2O2 concentration [μM] | Lactate [AUC relative to control] | Glucose [AUC relative to control] | Sucrose [AUC relative to control] |
|-----------------------------------------|-------------------------|-----------------------------------|-----------------------------------|-----------------------------------|
| LPO + SCN <sup>-</sup>                  | 250                     | 0.999 ± 0.068                     | 0.985 ± 0.025                     | 1.025 ± 0.025                     |
|                                         | 500                     | 1.062 ± 0.043                     | 0.998 ± 0.002                     | 0.995 ± 0.018                     |
|                                         | 1000                    | 1.059 ± 0.042                     | 1.010 ± 0.024                     | 0.945 ± 0.017                     |
| LPO + SCN <sup>-</sup> + I <sup>-</sup> | 250                     | 1.090 ± 0.015                     | 1.012 ± 0.042                     | 0.933 ± 0.025                     |
|                                         | 500                     | 0.987 ± 0.011                     | 0.963 ± 0.017                     | 1.056 ± 0.035                     |
|                                         | 1000                    | 1.040 ± 0.053                     | 0.988 ± 0.013                     | 1.100 ± 0.113                     |
| LPO + SeCN <sup>-</sup>                 | 250                     | 0.788* ± 0.089                    | 0.959 ± 0.020                     | 1.086 ± 0.035                     |

|                                   |      |                      |                   |                      |
|-----------------------------------|------|----------------------|-------------------|----------------------|
|                                   | 500  | 0.625*** $\pm$ 0.039 | 0.981 $\pm$ 0.028 | 1.050 $\pm$ 0.024    |
|                                   | 1000 | 0.554*** $\pm$ 0.053 | 0.998 $\pm$ 0.020 | 1.082 $\pm$ 0.048    |
| LPO + I <sup>-</sup>              | 250  | 0.000*** $\pm$ 0.000 | 0.950 $\pm$ 0.018 | 1.113 $\pm$ 0.049    |
|                                   | 500  | 0.000*** $\pm$ 0.000 | 0.972 $\pm$ 0.003 | 1.224*** $\pm$ 0.089 |
|                                   | 1000 | 0.000*** $\pm$ 0.000 | 0.979 $\pm$ 0.012 | 1.284*** $\pm$ 0.082 |
| SCN <sup>-</sup>                  | -    | 1.005 $\pm$ 0.025    | 1.011 $\pm$ 0.018 | 1.005 $\pm$ 0.045    |
| SCN <sup>-</sup> + I <sup>-</sup> | -    | 1.021 $\pm$ 0.011    | 1.001 $\pm$ 0.041 | 1.084 $\pm$ 0.022    |
| SeCN <sup>-</sup>                 | -    | 1.001 $\pm$ 0.035    | 1.054 $\pm$ 0.036 | 1.065 $\pm$ 0.046    |
| I <sup>-</sup>                    | -    | 1.015 $\pm$ 0.022    | 1.022 $\pm$ 0.048 | 1.038 $\pm$ 0.045    |
| H <sub>2</sub> O <sub>2</sub>     | 250  | 0.959 $\pm$ 0.029    | 1.005 $\pm$ 0.024 | 1.050 $\pm$ 0.026    |
|                                   | 500  | 0.962 $\pm$ 0.049    | 1.006 $\pm$ 0.022 | 1.016 $\pm$ 0.006    |
|                                   | 1000 | 0.975 $\pm$ 0.085    | 1.011 $\pm$ 0.042 | 1.022 $\pm$ 0.010    |
| Control                           | -    | 1.000 $\pm$ 0.033    | 1.000 $\pm$ 0.016 | 1.000 $\pm$ 0.024    |

**Table S3.** Area under kinetic curves (relative to control) of lactate production and glucose/sucrose consumption (biofilm 24 h). In the case of lactate, lower indicates on a slowed down production of lactate in tested system. In the case of glucose/sucrose, higher values indicates reduced consumption of glucose/sucrose by biofilm. Asterisks indicate a statistically significant difference between a tested group and the control in the post hoc Tukey's test—\*\*  $p < 0.01$ ; \*\*\*  $p < 0.001$ .

| System                                  | H2O2 concentration [μM] | Lactate [AUC relative to control] | Glucose [AUC relative to control] | Sucrose [AUC relative to control] |
|-----------------------------------------|-------------------------|-----------------------------------|-----------------------------------|-----------------------------------|
| LPO + SCN <sup>-</sup>                  | 250                     | 0.804*** $\pm$ 0.049              | 1.038 $\pm$ 0.018                 | 1.151 $\pm$ 0.018                 |
|                                         | 500                     | 0.677*** $\pm$ 0.029              | 1.019 $\pm$ 0.015                 | 1.139 $\pm$ 0.009                 |
|                                         | 1000                    | 0.682*** $\pm$ 0.053              | 1.047 $\pm$ 0.017                 | 1.158 $\pm$ 0.016                 |
| LPO + SCN <sup>-</sup> + I <sup>-</sup> | 250                     | 0.957 $\pm$ 0.072                 | 0.969 $\pm$ 0.009                 | 1.023 $\pm$ 0.024                 |
|                                         | 500                     | 0.767* $\pm$ 0.008                | 0.963 $\pm$ 0.012                 | 1.181 $\pm$ 0.006                 |
|                                         | 1000                    | 0.712* $\pm$ 0.045                | 0.963 $\pm$ 0.011                 | 1.135 $\pm$ 0.057                 |
| LPO + SeCN <sup>-</sup>                 | 250                     | 0.627*** $\pm$ 0.050              | 0.953 $\pm$ 0.014                 | 1.087 $\pm$ 0.031                 |
|                                         | 500                     | 0.471*** $\pm$ 0.053              | 0.968 $\pm$ 0.010                 | 1.075 $\pm$ 0.026                 |
|                                         | 1000                    | 0.312*** $\pm$ 0.025              | 0.980 $\pm$ 0.012                 | 1.082 $\pm$ 0.042                 |
| LPO + I <sup>-</sup>                    | 250                     | 0.000*** $\pm$ 0.000              | 0.969 $\pm$ 0.009                 | 1.346*** $\pm$ 0.030              |
|                                         | 500                     | 0.000*** $\pm$ 0.000              | 0.063 $\pm$ 0.012                 | 1.343*** $\pm$ 0.035              |
|                                         | 1000                    | 0.000*** $\pm$ 0.000              | 0.963 $\pm$ 0.011                 | 1.310*** $\pm$ 0.033              |
| SCN <sup>-</sup>                        | -                       | 0.989 $\pm$ 0.045                 | 1.022 $\pm$ 0.015                 | 1.011 $\pm$ 0.017                 |
| SCN <sup>-</sup> + I <sup>-</sup>       | -                       | 0.958 $\pm$ 0.069                 | 0.984 $\pm$ 0.028                 | 1.022 $\pm$ 0.011                 |
| SeCN <sup>-</sup>                       | -                       | 0.971 $\pm$ 0.024                 | 0.965 $\pm$ 0.022                 | 1.005 $\pm$ 0.009                 |
| I <sup>-</sup>                          | -                       | 0.948 $\pm$ 0.047                 | 0.978 $\pm$ 0.019                 | 1.031 $\pm$ 0.010                 |
| H <sub>2</sub> O <sub>2</sub>           | 250                     | 0.849 $\pm$ 0.049                 | 1.008 $\pm$ 0.019                 | 1.010 $\pm$ 0.016                 |
|                                         | 500                     | 0.902 $\pm$ 0.029                 | 1.011 $\pm$ 0.035                 | 1.026 $\pm$ 0.009                 |
|                                         | 1000                    | 1.072 $\pm$ 0.075                 | 1.035 $\pm$ 0.021                 | 1.060 $\pm$ 0.020                 |
| Control                                 | -                       | 1.000 $\pm$ 0.050                 | 1.000 $\pm$ 0.019                 | 1.000 $\pm$ 0.027                 |

**Table S4.** Amounts of NAD<sup>+</sup>, NADH in the well and NAD<sup>+</sup>/NADH ratio after treatment biofilm with all the tested systems (1000  $\mu$ M H<sub>2</sub>O<sub>2</sub>). Asterisks indicate a statistically significant difference between a tested group and the control in the post hoc Tukey's test—\*\*  $p < 0.01$ ; \*\*\*  $p < 0.001$ .

| System                                  | NADH [ $\mu$ g/well] | NAD [ $\mu$ g/well] | NADH/NAD             |
|-----------------------------------------|----------------------|---------------------|----------------------|
| LPO + SCN <sup>-</sup>                  | 2.32 $\pm$ 0.13      | 3.14 $\pm$ 0.01     | 0.739 $\pm$ 0.039    |
| LPO + SCN <sup>-</sup> + I <sup>-</sup> | 3.29 $\pm$ 0.41      | 3.65 $\pm$ 0.57     | 0.918 $\pm$ 0.191    |
| LPO + SeCN <sup>-</sup>                 | 3.50 $\pm$ 0.15      | 4.34*** $\pm$ 0.94  | 0.830 $\pm$ 0.162    |
| LPO + I <sup>-</sup>                    | 6.40*** $\pm$ 0.07   | 0.78** $\pm$ 0.01   | 8.220*** $\pm$ 0.012 |
| SCN <sup>-</sup>                        | 3.42 $\pm$ 0.20      | 2.51 $\pm$ 0.33     | 1.224 $\pm$ 0.312    |
| SCN <sup>-</sup> + I <sup>-</sup>       | 3.55 $\pm$ 0.14      | 2.74 $\pm$ 0.18     | 1.051 $\pm$ 0.147    |
| SeCN <sup>-</sup>                       | 3.22 $\pm$ 0.22      | 2.42 $\pm$ 0.08     | 1.007 $\pm$ 0.101    |
| I <sup>-</sup>                          | 3.81 $\pm$ 0.13      | 2.54 $\pm$ 0.74     | 1.288 $\pm$ 0.207    |
| H <sub>2</sub> O <sub>2</sub>           | 3.64 $\pm$ 0.56      | 2.58 $\pm$ 0.59     | 1.460 $\pm$ 0.436    |
| Control                                 | 3.36 $\pm$ 0.56      | 2.29 $\pm$ 0.19     | 1.470 $\pm$ 0.231    |

**Table S5.** PTS system activity in *S. mutans* cells treated with tested LPO system modifications and control sample. Asterisks indicate a statistically significant difference between a tested group and the control in the post hoc Tukey's test—\*  $p < 0.05$ , \*\*  $p < 0.01$ .

| System                                  | PTS activity [nM NADH/s] |
|-----------------------------------------|--------------------------|
| LPO + SCN <sup>-</sup>                  | 3.52* $\pm$ 2.33         |
| LPO + SCN <sup>-</sup> + I <sup>-</sup> | 1.89** $\pm$ 1.67        |
| LPO + SeCN <sup>-</sup>                 | 3.13** $\pm$ 1.85        |
| LPO + I <sup>-</sup>                    | 3.12** $\pm$ 2.59        |
| SCN <sup>-</sup>                        | 10.18 $\pm$ 3.35         |
| SCN <sup>-</sup> + I <sup>-</sup>       | 18.22 $\pm$ 6.87         |
| SeCN <sup>-</sup>                       | 11.41 $\pm$ 4.28         |
| I <sup>-</sup>                          | 10.17 $\pm$ 4.91         |
| Control                                 | 12.39 $\pm$ 5.25         |
